# Supplementary material
Source: MDPI journal article supplement (https://www.mdpi.com/2227-9040/11/1/50)
Supplement: s1 [file s1]

Supplementary Materials

# Ultrasensitive Electrochemical Sensor Based on SnO<sub>2</sub> Anchored 3D Porous Reduced Graphene Oxide Nanostructure Produced via Sustainable Green Protocol for Subnanomolar Determination of Anti-Diabetic Drug, Repaglinide

Ayyappayya Mathad <sup>1</sup>, Karuna Korgaonkar <sup>1</sup>, Seetharamappa Jaldappagari <sup>1,\*</sup> and Shankara Kalanur <sup>2,\*</sup>

<sup>1</sup> Department of Chemistry, Karnatak University, Dharwad 580003, Karnataka, India

<sup>2</sup> Hydrogen Research Institute (IRH), Université du Québec à Trois-Rivières, 3351 Boulevard des Forges, Trois-Rivières, QC G9A 5H7, Canada

\* Correspondence: drjseetharamappa@kud.ac.in (S.J.); shankara.kalanur@uqtr.ca (S.K.)

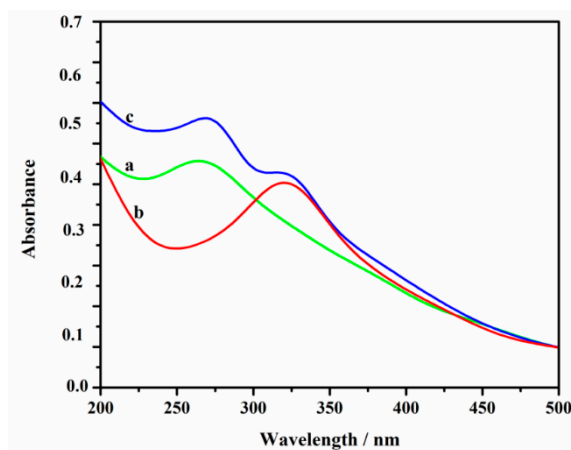

Figure S1. UV-visible absorption spectra of p-rGO (a), SnO<sub>2</sub> (b), and SnO<sub>2</sub>@p-rGO (c).

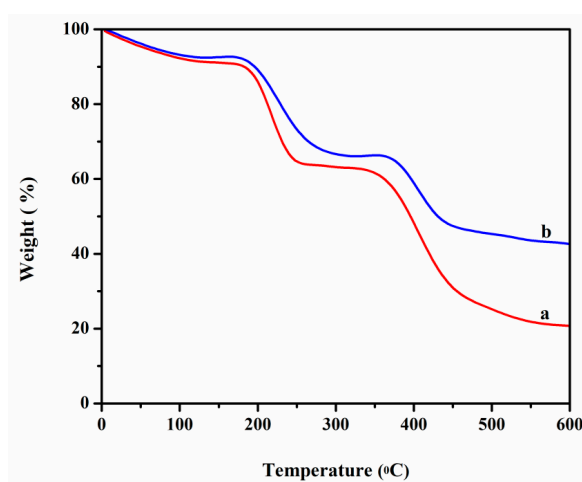

Figure S2. TGA curves for p-rGO (a) and SnO<sub>2</sub>/p-rGO (b).

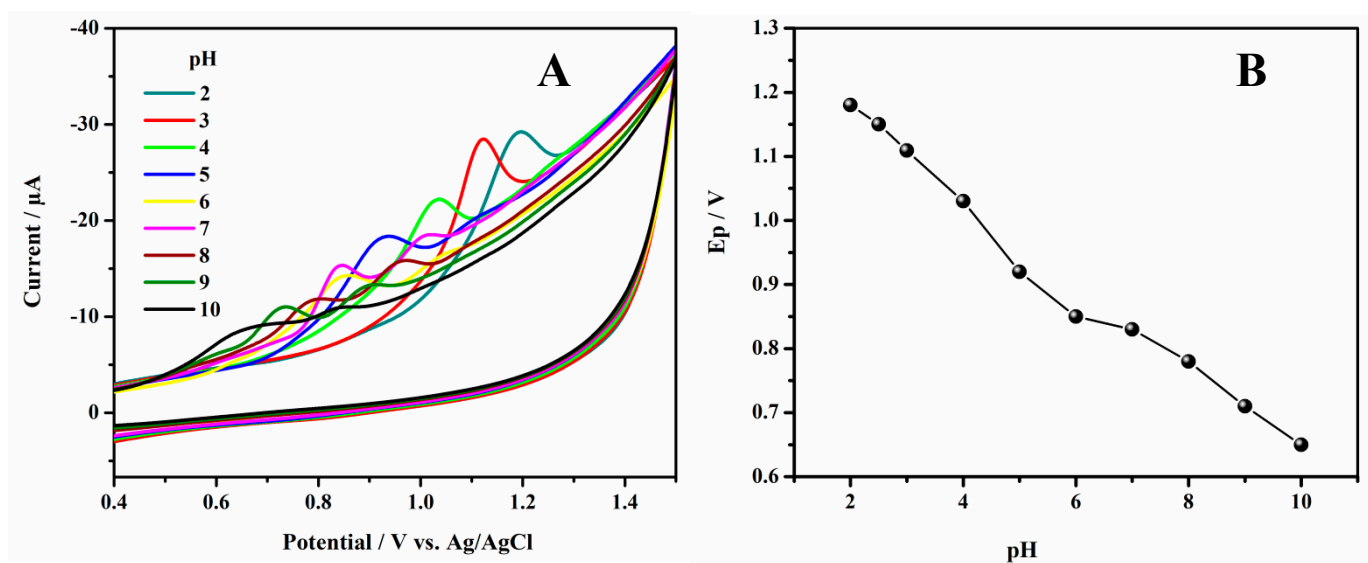

Figure S3. (A) Cyclic voltammograms of 10  $\mu\text{M}$  RPG at different pH and (B) plot of  $E_p$  vs. pH.

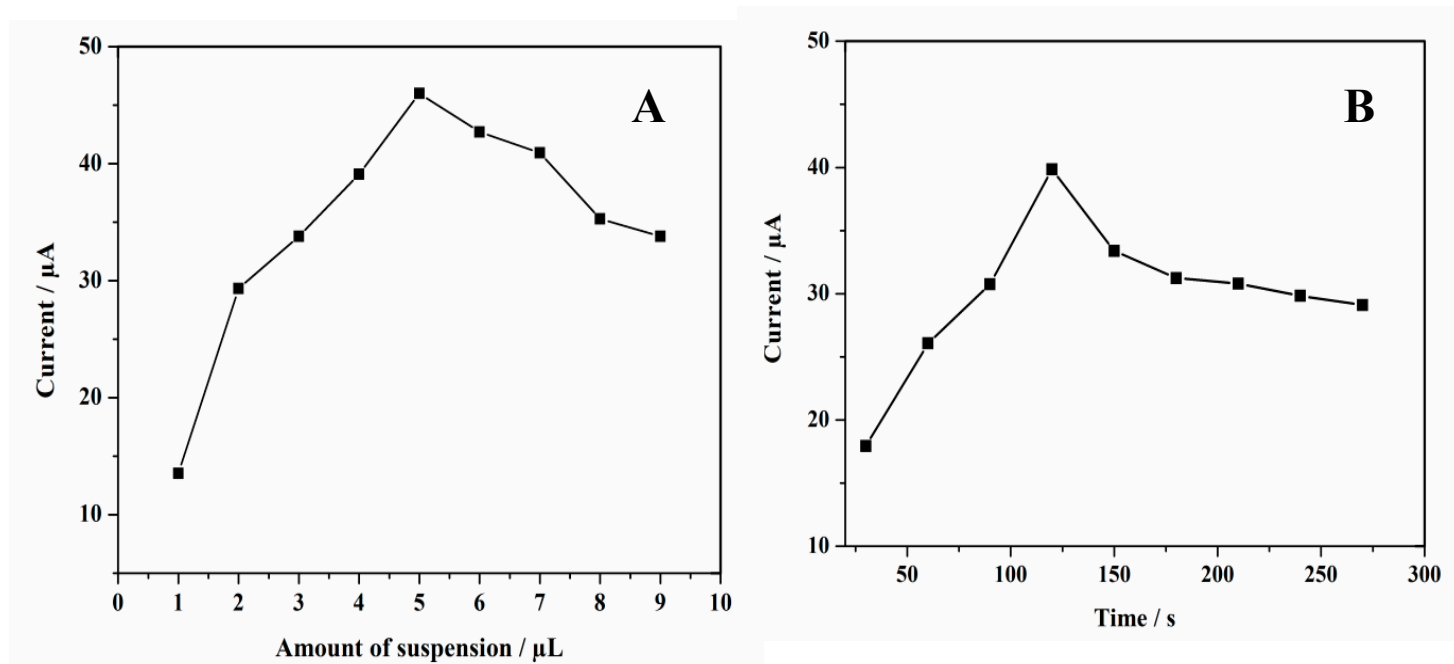

Figure S4. (A) Dependence of peak current on the amount of  $\text{SnO}_2/\text{p-rGO}$  suspension and (B) accumulation time.

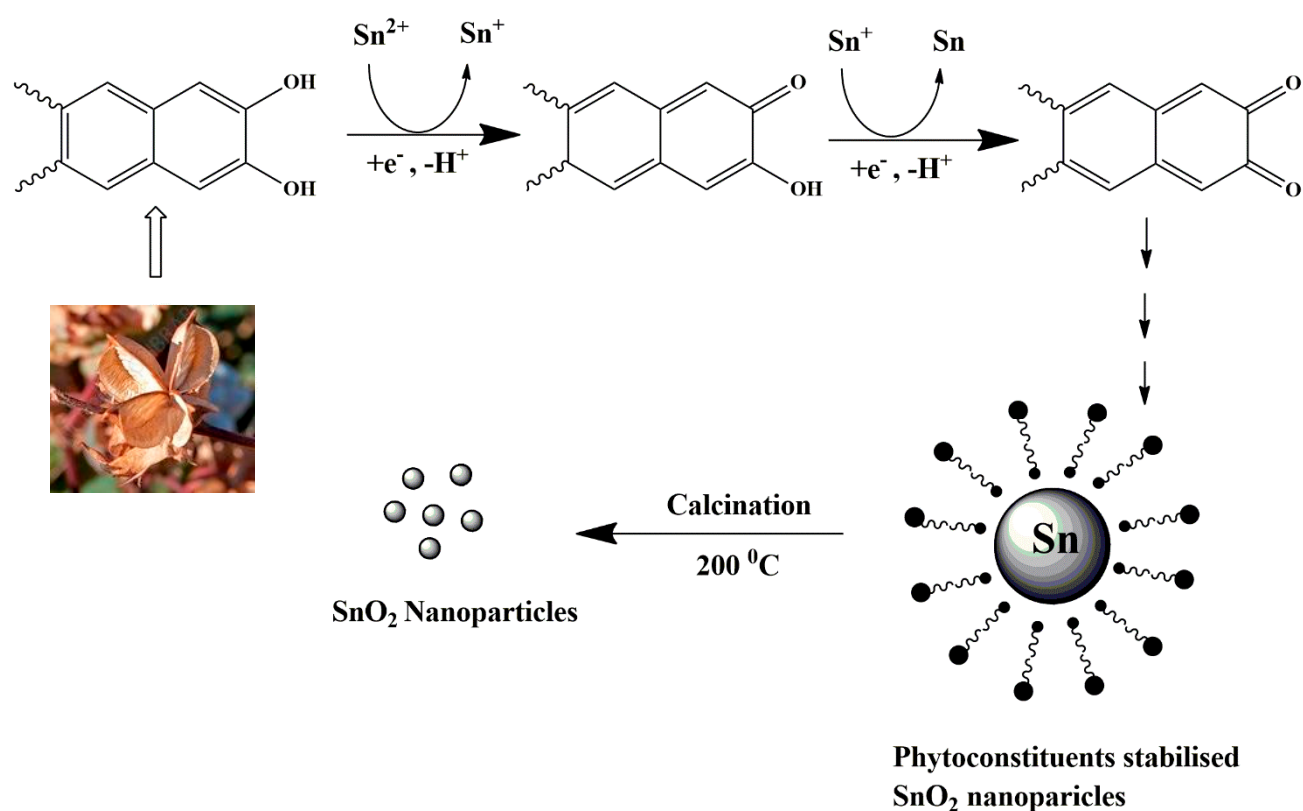

**Scheme S1.** Plausible mechanism for the formation of SnO<sub>2</sub> nanoparticles by cotton boll peel extract.

**Table S1.** Tolerance of interferents in the determination of 2.26 µg mL<sup>-1</sup> RPG using proposed sensor by SWV method.

| Interfering substance | Concentration of interfering substance (µg mL <sup>-1</sup> ) | Fold  | Recovery (%) | RSD*, % |
|-----------------------|---------------------------------------------------------------|-------|--------------|---------|
| Ascorbic acid         | 48                                                            | 21.23 | 97.49        | 2.98    |
| Glucose               | 128                                                           | 56.63 | 98.48        | 2.42    |
| Uric acid             | 46                                                            | 20.35 | 96.43        | 1.65    |
| Lactose               | 200                                                           | 88.49 | 98.79        | 2.12    |
| Acacia                | 82                                                            | 36.28 | 98.52        | 1.77    |
| Dopamine              | 48                                                            | 21.23 | 99.06        | 2.46    |
| Metformin             | 45                                                            | 19.91 | 97.65        | 2.34    |

\*Average of 5 determinations
